# Supplementary material
Source: PubMed Central journal article supplement (PMC10042524)
Supplement: NIHMS1876628-supplement-Supplemental_Material.pdf [file NIHMS1876628-supplement-Supplemental_Material.pdf]

## Supplementary Appendix

Supplement to: Goldstick JE, Cunningham RM, Carter PM. Current causes of death in children and adolescents in the United States. *N Engl J Med* 2022;386:1955-6. DOI: 10.1056/NEJMc2201761

This appendix has been provided by the authors to give readers additional information about the work.

# Contents

|                |   |
|----------------|---|
| Figure S1..... | 1 |
|----------------|---|

**Figure S1:** Rates of firearm mortality per 100,000 persons age 1-19 in the United States in 2019 and in 2020, by sex, race/ethnicity, and mechanism of death.

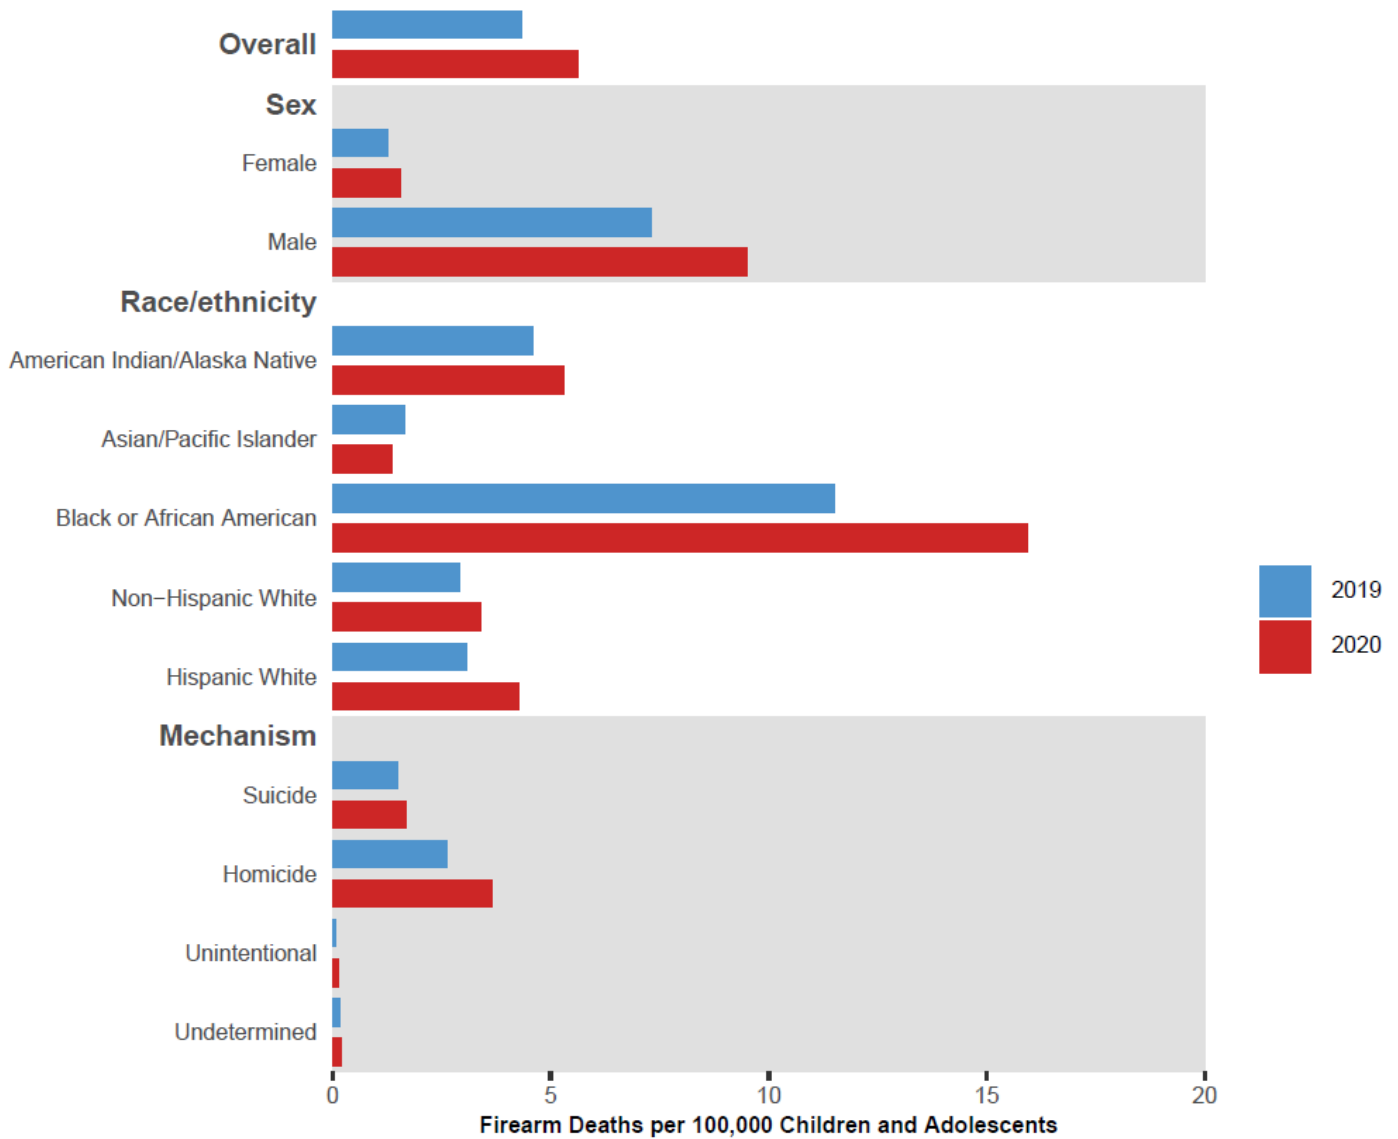

Source: Centers for Disease Control and Prevention Wide-Ranging Online Data for Epidemiologic Research (wonder.cdc.gov). Causes were classified using the following ICD-10 Codes:

Overall Firearm Mortality: W32-W34; X72-74; X93-X95; Y22-Y24; Y35.0; U01.4

Firearm Suicide: X72-X74

Firearm Homicide: X93-X95, Y35.0, U01.4

Unintentional Firearm Death: W32-W34

Undetermined Intent Firearm Death: Y22-Y24
